# Supplementary material for: De Novo Transcriptome Sequencing of Oryza officinalis Wall ex Watt to Identify Disease-Resistance Genes
Source: Int J Mol Sci. 2015 Dec 10;16(12):29482–95. doi: 10.3390/ijms161226178 (PMC4691121; doi:10.3390/ijms161226178)
Supplement: Supplementary file 1 [file ijms-16-26178-s001.xlsx]

## Sheet: Figure S1
Figure S1. Alignment of the OsWRKY45 amino acid sequence from O. officinalis with OsWRKY45-1 and OsWRKY45-2.

## Sheet: Table S1
Table S1. Genes involved in plant-pathogen interaction and its expression pattern in O. officinalis.
Sub_pathway	Contig ID	Function	KO number	Leaf_RPKM	Root_RPKM	Stem_RPKM
PTI	Contig_516	calcium-dependent protein kinase (CDPK)	K13412	0.45	0.71	0.98
	Contig_4409	cyclic nucleotide gated channel (CNGCs)	K05391	0	0	0
	Contig_4970	respiratory burst oxidase (Rboh)	K13447	0.18	0	0
	Contig_47867	nitric-oxide synthase (NOS)	K13427	39.73	2.63	8.5
	Contig_6146	mitogen-activated protein kinase kinase kinase (MEKK)	K13414	4.89	6.33	17.59
	Contig_51666	mitogen-activated protein kinase kinase 1 (MKK1)	K04368	0.8	1.91	0.53
	Contig_36644	mitogen-activated protein kinase kinase 4/5 (MKK4/5)	K13413	6.18	126.01	47.05
	Contig_15502	senescence-induced receptor-like serine/threonine-protein kinase (FPK)	K16224	1.5	4.35	0.7
	Contig_30341	glycerol kinase (NHO)	K00864	17.1	43.05	15.32
	Contig_40371	calcium-binding protein CML (CaMCML)	K02183	24.76	102.13	54.14
	Contig_7454	LRR receptor-like serine/threonine-protein kinase FLS2	K13420	0.02	6.34	0.32
	Contig_8664	WRKY transcription factor 33 (WRKY33)	K13424	1.13	7.52	0.37
	Contig_52053	WRKY transcription factor 29 (WRKY29)	K13426	0.53	4.57	0.65
	Contig_71076	pathogenesis-related protein 1 (PR1)	K13449	1.22	19.15	0.11
ETI	Contig_56403	RPM1-interacting protein 4 (RIN4)	K13456	0	0	0
	Contig_5621	disease resistance protein RPM1 (RPM1)	K13457	1.59	0	0
	Contig_34304	suppressor of G2 allele of SKP1 (SGT1)	K12795	4.97	10.67	13.47
	Contig_35703	heat shock protein (HSP90)	K04079	0.05	0.16	0.14
	Contig_66753	disease resistance protein RAR (RAR)	K13458	17.33	26.24	28.86
	Contig_41902	disease resistance protein RPS2 (RPS2)	K13459	2.93	4.95	2.91
	Contig_51564	serine/threonine-protein kinase PBS1 (PBS1)	K13430	0.18	3.31	5.19

## Sheet: Table S2
Table S2. Genes involved in plant hormones regulation and its expression pattern in O. officinalis.
Sub_pathway	Contig ID	Function	KO number	Leaf_RPKM	Root_RPKM	Stem_RPKM
JA	Contig_1689	jasmonic acid-amino synthetase (JAR)	K14506	0	0	0
	Contig_25951	coronatine-insensitive protein 1 (COI-1)	K13463	3.09	5.35	8.82
	Contig_34076	jasmonate ZIM domain-containing protein (JAZ)	K13464	0	0.67	0.37
	Contig_19125	transcription factor MYC2 (MYC2)	K13422	22.37	170.84	99.97
SA	Contig_19402	regulatory protein NPR1 (NPR1)	K14508	27.2	93.18	40.64
	Contig_29535	transcription factor TGA (TGA)	K14431	0.61	7.48	0.68
	Contig_71076	pathogenesis-related protein 1 (PR1)	K13449	1.22	19.15	0.11
ABA	Contig_44247	abscisic acid receptor PYR/PYL family (PYR/PYL)	K14496	40.5	13.11	31.89
	Contig_44476	protein phosphatase 2C (PP2C)	K14497	0.48	1.46	0.9
	Contig_44752	serine/threonine-protein kinase SRK2 (SnRK2)	K14498	2.83	0.51	0
	Contig_45074	ABA responsive element binding factor (ABF)	K14432	2.65	3.44	5.85
